# Supplementary material for: A non-equilibrium Ti4+doping strategy for an efficient hematite electron transport layer in perovskite solar cells
Source: Royal Society of Chemistry journal article supplement (doi:10.1039/c8dt00692j), 2018-01-01
Supplement: c8dt00692j1.pdf [file c8dt00692j1.pdf]

## Supporting Information

### Non-equilibrium $\text{Ti}^{4+}$ doping strategy for an efficient hematite electron transport layer in perovskite solar cells

Weidong Zhu,<sup>a,†,\*</sup> Qianni Zhang,<sup>a,†</sup> Chunfu Zhang,<sup>a,\*</sup> Dazheng Chen,<sup>a</sup> Long Zhou,<sup>a</sup> Zhenhua Lin,<sup>a</sup> Jingjing Chang,<sup>a</sup> Jincheng Zhang,<sup>a,\*</sup> and Yue Hao<sup>a</sup>

<sup>a</sup>State Key Discipline Laboratory of Wide Band Gap Semiconductor Technology & Shaanxi Joint Key Laboratory of Graphene, School of Microelectronics, Xidian University, Xi'an, 710071, China

<sup>†</sup>These authors contributed equally to the work.

\*Address correspondence to [wdzhu@xidian.edu.cn](mailto:wdzhu@xidian.edu.cn), [cfzhang@xidian.edu.cn](mailto:cfzhang@xidian.edu.cn), [jchzhang@xidian.edu.cn](mailto:jchzhang@xidian.edu.cn)

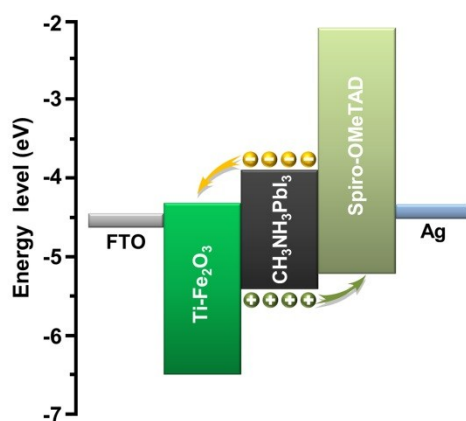

**Fig. S1** Energy level diagram of planar perovskite solar cell with the configuration of FTO/Ti-Fe<sub>2</sub>O<sub>3</sub>/CH<sub>3</sub>NH<sub>3</sub>PbI<sub>3</sub>/Spiro-OMeTAD/Ag.

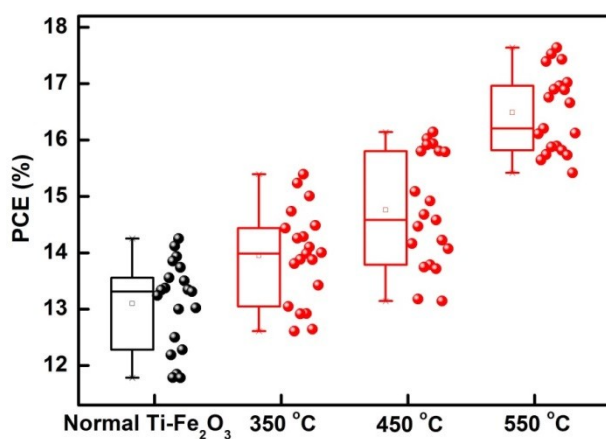

**Fig. S2** Statistical PCEs of the cells with Ti-Fe<sub>2</sub>O<sub>3</sub> ETLs prepared by routinely natural cooling (Normal Ti-Fe<sub>2</sub>O<sub>3</sub>) and quenching recipe with the quenching temperatures of 550, 450, and 350 °C, respectively. Each PCE were measured under 1.5 G simulated sunlight (100 mW cm<sup>-2</sup>) in the reverse sweep (from 1.5 to -0.1 V) with the rate of 100 mV s<sup>-1</sup>.

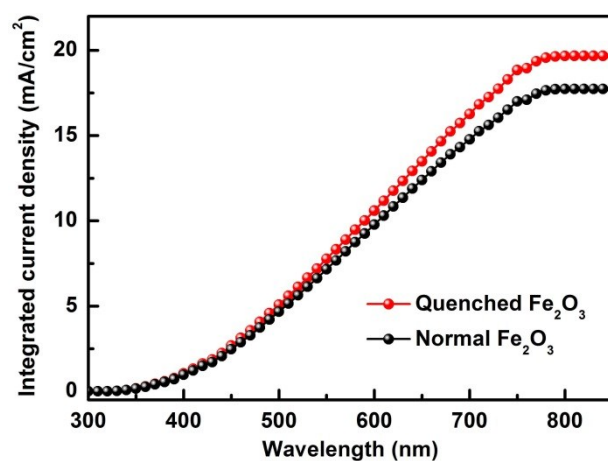

**Fig. S3** Integrated current densities from the EQE spectra for the optimized cells fabricated with normal and quenched Ti-Fe<sub>2</sub>O<sub>3</sub> ETLs.

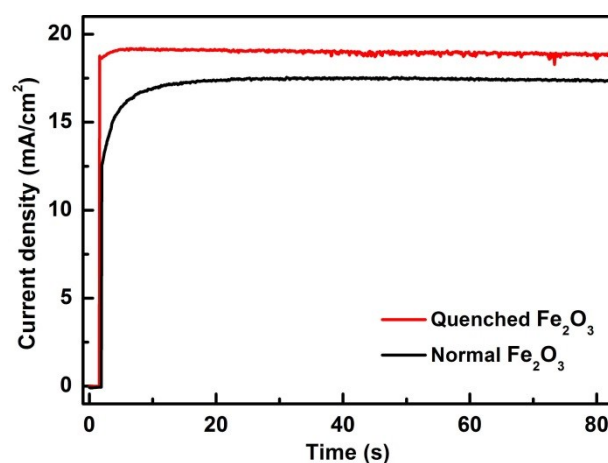

**Fig. S4** Steady-state current output at the maximum power point for the optimized cells fabricated with normal and quenched Ti-Fe<sub>2</sub>O<sub>3</sub> ETLs, respectively.

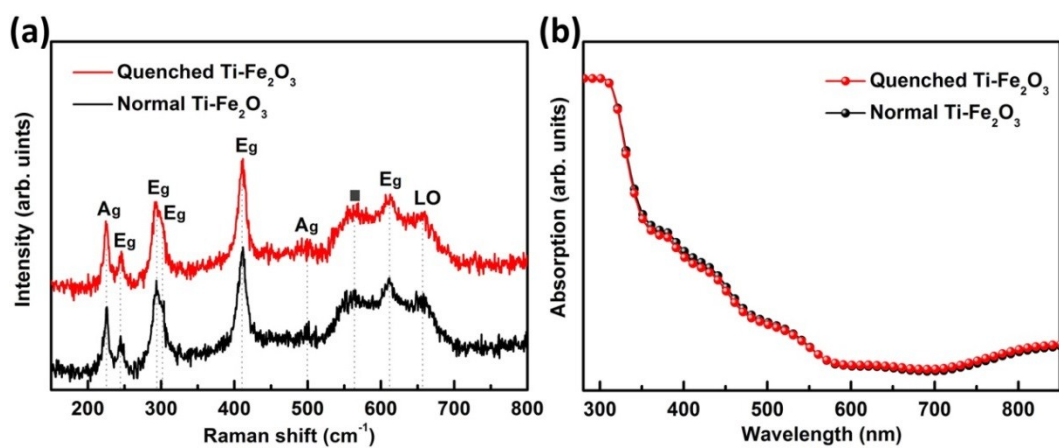

**Fig. S5** (a) Raman spectra and UV-Vis spectra of normal and quenched  $\text{Ti-Fe}_2\text{O}_3$  ETLs.

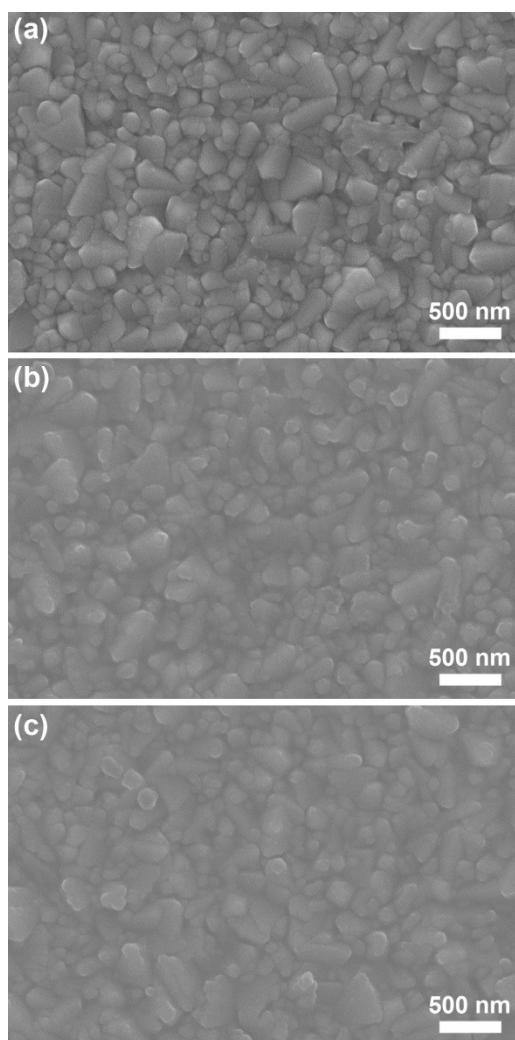

**Fig. S6** SEM images of (a) bare FTO, (b) normal  $\text{Ti-Fe}_2\text{O}_3$  ETL, and (c) quenched  $\text{Ti-Fe}_2\text{O}_3$  ETL, respectively.

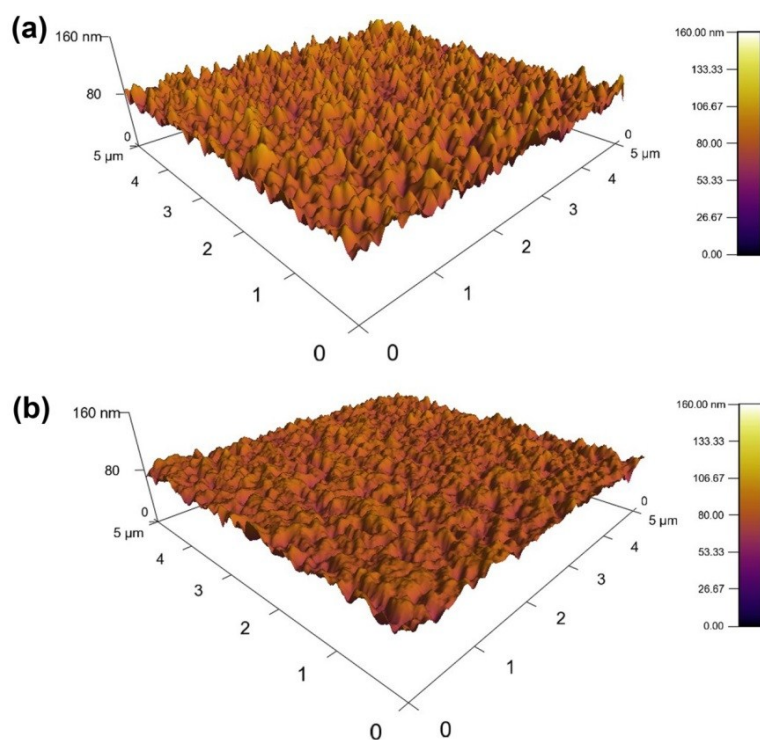

**Fig. S7** AFM height images of (a) normal Ti-Fe<sub>2</sub>O<sub>3</sub> ETL and (b) quenched Ti-Fe<sub>2</sub>O<sub>3</sub> ETL.

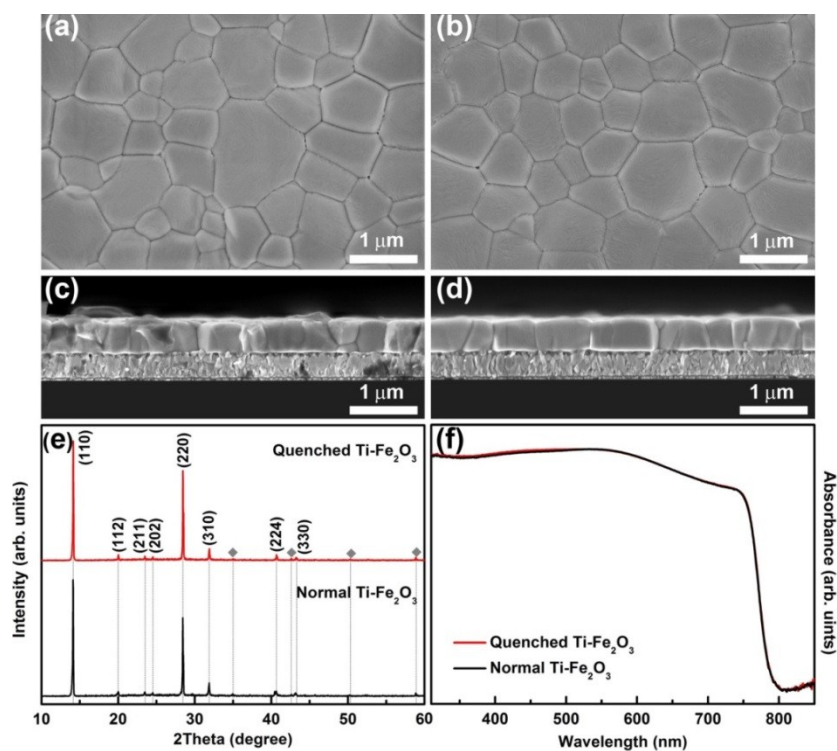

**Fig. S8** Surficial and cross-sectional SEM images of (a and c) normal Ti-Fe<sub>2</sub>O<sub>3</sub> ETL and (b and d) quenched Ti-Fe<sub>2</sub>O<sub>3</sub> ETL. (e) XRD patterns and (f) UV-vis absorption spectra of the corresponding samples.

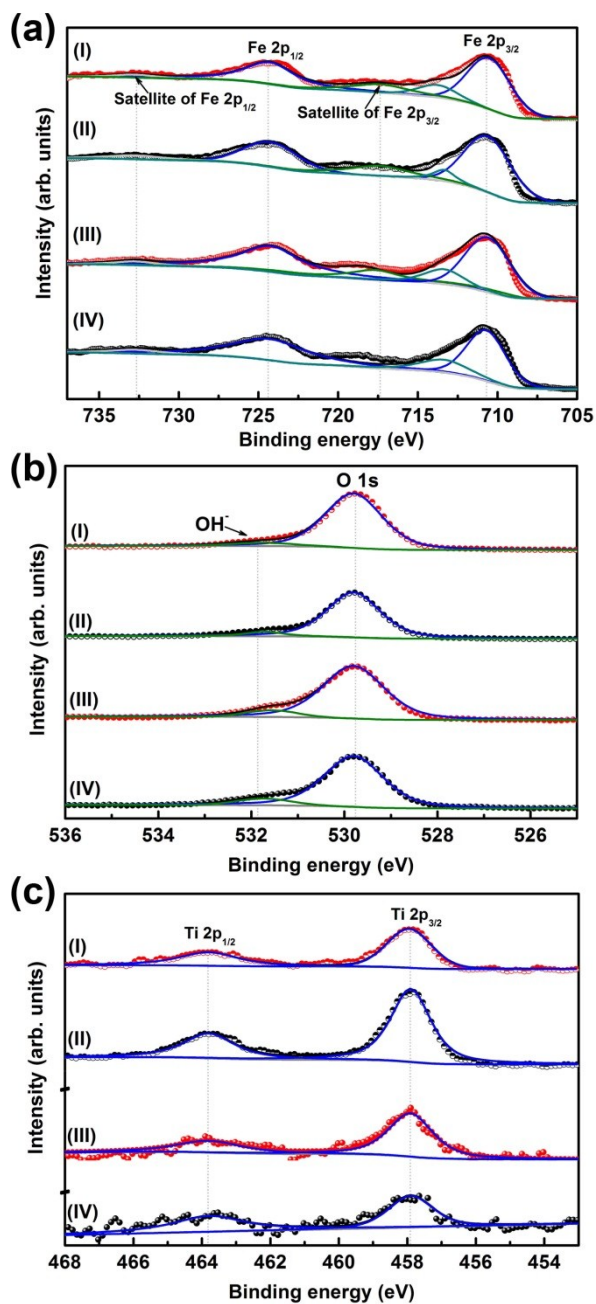

**Fig. S9** Surface and bulk XPS spectra of (a) Fe 2p, (b) O 1s, and (c) Ti 2p for normal and quenched Ti-Fe<sub>2</sub>O<sub>3</sub> ETLs. (I), (II), (III), and (IV) represent the surface of quenched Ti-Fe<sub>2</sub>O<sub>3</sub> ETL, the surface of normal Ti-Fe<sub>2</sub>O<sub>3</sub> ETL, the bulk of quenched Ti-Fe<sub>2</sub>O<sub>3</sub> ETL, and the bulk of normal Ti-Fe<sub>2</sub>O<sub>3</sub> ETL. Two satellite peaks at around 717.5 eV and 732.8 eV in panel (a) manifests that iron in the sample is at high oxidation state (Fe<sup>3+</sup>) rather than low oxidation state (Fe<sup>2+</sup>).<sup>[1,2]</sup>

#### Reference

[1] Z. Huang, J. Cheng, X. Ren, J. Zhuang, V. A. Roy, J. M. Burkhartsmeier, K. S. Wong and

W. C. Choy, *Nano Energy*, 2018, DOI:10.1016/j.nanoen.2018.02.019.

[2] L. Wang, H. Yang, X. Liu, R. Zeng, M. Li, Y. Huang and X. Hu, *Angewandte Chemie*, 2017, **129**, 1125-1130.
